## Review

# Improving access and provision of pre-travel healthcare for travellers visiting friends and relatives: a review of the evidence<sup>†</sup>

Anita E. Heywood, BSc, MPH, PhD<sup>1\*</sup> and Nicholas Zwar, MBBS, FRACGP, FACTM, MPH, PhD<sup>1,2</sup>

<sup>1</sup>School of Public Health and Community Medicine, UNSW Sydney, Australia and <sup>2</sup>School of Medicine, Faculty of Science, Medicine and Health, University of Wollongong, Australia

\*To whom correspondence should be addressed. Tel: +61-2-93853667. Email: a.heywood@unsw.edu.au

<sup>†</sup>This review is based on the presentation: Novel Strategies to engage VFRs. Symposium: The Intersection of Migrant and Travel Health. 14th Conference of the International Society of Travel Medicine. Quebec City, Canada, 24–28 May, 2015.

Submitted 4 October 2017; Revised 15 January 2018; Editorial decision 1 February 2018; Accepted 2 February 2018

## Abstract

**Background:** Travellers visiting friends and relatives (VFR travellers) in their country of origin are at increased risk of a range of preventable infections. Risks are broadly related to circumstances of travel, risk misconceptions and access to health services. Despite nearly two decades of literature highlighting these increased risks little impact has been made on their risk disparity.

**Methods:** This review draws on evidence from travel medicine literature, supplemented by evidence from the broader field of immigrant health, and is structured to include strategies that aim to reduce barriers at the patient, provider and health system level.

**Results:** For the travel medicine provider, tailored risk communication that is cognisant of the unique health beliefs and barriers to travel health for VFR travellers is needed, including enhanced communication through the use of interpreters and supplementary written communication. Primary care providers are uniquely placed to identify future travel plans among immigrant patients, however, greater awareness of VFR traveller risks and training in travel medicine are required. Community health promotion interventions that are culturally appropriate, translated into multiple languages and takes into account the cumulative risk of multiple return visits are key to normalizing travel healthcare seeking behaviours and improving awareness of VFR travel risks. Currently, there are few examples of novel strategies to engage migrant communities in travel health with no formal evaluations of their effectiveness. Best practice includes the use of community-consulted approaches in collaboration with government, primary care and travel medicine.

**Conclusions:** Multifactorial barriers related to health beliefs and access to health services require a range of strategies and interventions in both reaching and providing advice to VFR travellers. To improve the evidence base, future research should focus on the evaluation of novel strategies that address these barriers and improve access and provision of pre-travel healthcare to VFR travellers.

**Key words:** Visiting friends and relatives, immigrants, travel health, risk, prevention

## Introduction

Increases in global migration and changing patterns of source countries have altered the cultural diversity of many countries and subsequently, the geographical patterns of international travel.

Immigrants comprise a substantial proportion of developed country populations.<sup>1,2</sup> An estimated one in four international travellers are travelling for the purpose of visiting friends and relatives ('VFR travellers')<sup>3</sup> with a greater share of travel to developing countries.<sup>4</sup>

While several definitions have been presented to classify VFR travellers,<sup>5–7</sup> for the purpose of a pre-travel risk assessment VFRs are generally considered to be returning to their country of origin (or parents' or spouse's country of origin) in which there is a higher infectious disease risk.<sup>6</sup>

A range of studies have identified a greater risk of several serious, preventable infectious diseases during travel for VFR travellers compared to those travelling for other purposes.<sup>8–11</sup> Several key review papers summarized these increased risks in the mid-2000s<sup>12–15</sup> and specific recommendations for risk assessment and provision of advice during pre-travel consultations for this special risk group were developed.<sup>5,16</sup> However, despite nearly two decades of literature highlighting increased risks for VFR travellers, little impact has been made on their risk disparity. Routine surveillance of cases of notifiable travel-associated diseases by country of birth, ethnicity or reason for travel provide an evidence base for identifying the at-risk traveller and the changing patterns of risk. Immigrants and their children are disproportionately represented in national notifiable disease data for infections acquired during travel, including malaria, hepatitis A and typhoid.<sup>9,10,17,18</sup> Children travelling for VFR purposes are over-represented,<sup>8,9,19–21</sup> particularly for vaccine-preventable diseases.<sup>9,10</sup>

Circumstances of the itinerary, misconceptions of health risks and limited access to preventative health services broadly categorize the factors associated with the increased risk for VFR travellers. VFR travel is not simply a reason for travel. By definition, this group of travellers are more likely to travel to high risk destinations<sup>8,22</sup> and for a longer duration.<sup>8,22,23</sup> VFR travellers, including VFR children, are approximately half as likely to seek pre-travel health advice from a health professional compared to other travellers.<sup>4,20,21,24–27</sup> Further, immigrants are less likely to seek pre-travel health advice, irrespective of reason for travel.<sup>4,24,25,27</sup> Perceptions of low risk when 'going home' and previous healthy travel are the main drivers of this poor attendance along with a reported lack of awareness of the need for advice.<sup>4,24,28</sup> Belief that they are immune, particularly to malaria, or that their vaccines are 'up to date' are also commonly reported.<sup>24,28–30</sup> Other important perceptions for this at-risk group are of a low disease severity, their ability to self-manage and obtain effective treatments when ill<sup>24</sup> and as well as not wanting to impose their preventative practices on friends and relatives.<sup>31,32</sup> As a consequence, VFR travellers may underestimate their or their children's risk profile and are less likely to impose diet restrictions<sup>28</sup> or take or correctly adhere to malaria chemoprophylaxis<sup>24,33</sup> and are more likely to decline vaccine recommendations<sup>22–24,34</sup> than other travellers. While health beliefs are significant drivers of low uptake, other factors also impact on access to and provision of pre-travel healthcare to this group, including financial costs, late presentation and language barriers. Improved access to pre-travel health advice has been associated with a longer length of migration.<sup>35</sup>

The current approach to reducing the infectious disease risks of travellers requires a traveller to acknowledge their risk and seek appropriate advice to reduce that risk. Both reaching and providing advice to VFR travellers are important issues for travel medicine. This review draws on evidence from travel medicine literature, supplemented by evidence from the broader field of immigrant health and is structured to review strategies that aim to reduce barriers at the patient, provider and health system level and provides recommendations for future research needs.

## Strategies for the travel medicine practitioner

Structural and service modifications at a practice and provider level can have positive outcomes on VFR engagement. These include strategies to limit financial barriers, to provide a welcoming environment for immigrants and their families and strategies to reduce language and cultural barriers to improve attendance and the effectiveness of consultations. Assistance in prioritizing preventive health strategies, introducing sliding fee scales and referring patients to less costly services (if available) for immunization are options for reducing potential financial burden. Few quantitative studies identify cost as a barrier; of those studies 2–16% of travellers overall report cost as a barrier<sup>24,36,37</sup> with VFR travellers (6.2%) less likely to report cost as a barrier than other travellers (10.9%,  $P = 0.04$ ).<sup>24</sup> However, cost associated with pre-travel consultations and vaccines are purported by providers<sup>38</sup> and in qualitative studies of VFR travellers<sup>31,32</sup> as an important barrier.

Currently, there is very little empirical evidence of the effectiveness of strategies to engage VFR travellers at the practice level. For travel medicine providers, strategies that include the tailoring of risk communication and enhancing communication, summarized below, aim to improve uptake and adherence to preventative health measures and retention of travel health messages among attending VFR travellers.

### Tailoring risk communication

Barriers to and benefits of preventative practices are the strongest predictors of health behaviours<sup>39</sup> and there are several strategies for the practitioner to effect behaviour change. Recognizing the unique relationship of a VFR traveller to their destination is key. The common travel risk communication approach of first establishing the disease risk may conflict with VFR travellers' pre-conceived beliefs, resulting in a disregard of provider recommendations<sup>13</sup> or poor adherence to malaria chemoprophylaxis.<sup>40</sup> Qualitative studies have identified difficulties for VFRs in advocating for the use of bed nets and food choices with their host family and friends.<sup>31,32</sup> A patient-centred or shared decision-making approach which focuses on overcoming acknowledged barriers may be a more effective approach,<sup>13,32</sup> including negotiating risk avoidance in the context of fulfilling familial obligations.<sup>32</sup> Once established in their country of residence, immigrants are frequent visitors to their country of birth,<sup>9,24,25</sup> contributing to a lifetime of travel risks. A discussion of the cumulative risk of multiple return visits<sup>41</sup> may improve uptake of recommended vaccines, particularly those with a long duration of protection, as well as other preventative measures. Despite these challenges, provider recommendations remain central to increasing uptake, with recommendation by a health provider the single most important factor in the uptake of routine vaccines<sup>42</sup> and 'not being advised' a commonly reported reason for not receiving a vaccine prior to travel.<sup>24</sup> The Health Belief Model has been shown to align with vaccination behaviour for parents and adults, including healthcare workers,<sup>43,44</sup> particularly the constructs of perceived benefits, barriers and cues to action. However, less evidence has been presented for alignment of behavioural models with immigrant immunization or travel health.<sup>45</sup>

### Enhancing patient–provider communication

Language and cultural barriers may impact on the effectiveness of advice provided at pre-travel consultations. Language barriers to

accessing pre-travel health services have not been adequately explored, with traveller studies likely to exclude those not speaking the dominant language, but is a well-established barrier to health-care access in the immigrant health literature.<sup>46</sup> Of primary health-care providers in multicultural areas of Sydney, Australia, 29% reported language as barrier to the provision of pre-travel health advice to VFR travellers.<sup>38</sup> When providing patient-centred travel healthcare, formal cultural competence training may enhance effective communication skills in the context of differing social, cultural and linguistic needs.<sup>47</sup> Differing cultural belief systems around health and disease may also depend on varying degrees of acculturation, time since migration and other factors.<sup>32,48</sup> Some VFR travellers, including Hajj pilgrims, may consider themselves or their family and friends to be more conversant of destination risks than a healthcare provider of a different ethnicity.<sup>30,49</sup> However, immigrant patients rate communication skills above shared ethnicity in their satisfaction with providers,<sup>50</sup> highlighting the benefits of socially and culturally informed communication strategies.

Studies show a poor recall of travel health messages in the absence of language barriers.<sup>51,52</sup> The use of professionally trained interpreters and supplementary written travel health information are strategies to overcome language barriers and potentially improve retention of travel health messages for VFR travellers. While evidence of improved pre-travel risk communication is lacking, a large body of research across multiple healthcare disciplines shows the positive impact of professionally trained interpreters on the quality of patient communication, including better recall of information, self-reported understanding and satisfaction with the quality of care provided.<sup>53</sup> While there are challenges in the integration of professionally trained interpreters into patient consultations, informal interpreters are not considered best practice but may be beneficial when trained interpreters are not available or practicable.<sup>54</sup> Reinforcing verbal advice provided during a travel consultation through the provision of supplementary written advice is more important for travellers for whom language is a barrier. While written information in the patient's preferred language is desirable, written advice can be read by other family members, friends or migrant services.<sup>55</sup>

### Strategies to enhance VFR travel advice in primary care

Primary care providers play a key role in the provision of pre-travel health advice to VFR travellers. Of travellers who report seeking pre-travel health advice, up to 80% do so from their primary care provider<sup>26,27,36</sup> and this proportion is greater for VFR travellers.<sup>27</sup> Primary care providers may be better suited to providing care to VFR travellers, with the advantages of reduced financial barriers, continuity of care and ease of access.<sup>10, 56</sup> Despite their key role, few primary care providers have additional postgraduate training in travel medicine.<sup>38,57,58</sup> Primary care providers may not be aware of the increased risk of VFR travel,<sup>38</sup> and may lack confidence in counselling immigrants regarding risks in their country of birth.<sup>38</sup> Training in travel risk assessment and risk communication by primary care providers has been shown to improve the provision of advice<sup>59-61</sup> and the quality of advice given<sup>57,62-64</sup> to holiday travellers. For primary care providers who see few travellers, stronger partnerships with travel medicine practitioners for referral or expert advice is important. However, referral to travel medicine

specialists is generally low with immigrants or VFR travellers not reported as common reasons for referral<sup>38,56,58</sup> despite their increased risk profile.

Primary care providers are key players at the intersect of immigrant and travel health and opportunistic pre-travel consultations for immigrants and their families has the potential to increase VFR travellers access to pre-travel health advice. In a US paediatric outpatient clinic, screening for future travel identified a third of families originating from high malarial risk areas had future travel plans.<sup>65</sup> VFR travellers attended the Global TravEpiNet Boston clinics a median of 17 days before departure compared to 26 days for non-VFR travellers ( $P < 0.0001$ ).<sup>4</sup> Routinely enquiring about future travel during consultations aims to reduce missed opportunities in providing pre-travel health advice, reduces the barrier of late presentation to the completion of vaccine schedules,<sup>4,21,38</sup> and conveys the importance of a holistic, whole of life approach to immigrant travel health.<sup>41</sup> Further, written information is not a tool commonly utilized by primary care providers.<sup>58,59,66</sup> Numerous quality travel health resources for practitioners are available and wider distribution of these resources to primary care providers, particularly those practicing in ethnically diverse communities is warranted. A greater awareness by primary care providers of the increased risk associated with VFR travel is required in order to opportunistically target immigrants for pre-travel consultations. Continuing medical education in travel medicine, the promotion of integrating discussion of future travel plans into routine practice, and improved partnerships are approaches in the primary care setting aimed at improving access to and provision of high quality pre-travel healthcare for VFR travellers.

### Community travel health promotion and education strategies

A lack of travel health information or services targeting culturally diverse backgrounds may contribute to the low uptake of professional, targeted advice by VFR travellers.<sup>67</sup> Cues to action, such as health promotion messages, are important motivators to undertake preventative health behaviours. Health promotion messages at the community level aim to increase awareness of the risks associated with VFR travel, motivate VFR travellers to protect their health and to encourage greater attendance for pre-travel health consultations with health providers. However, the diversity of ethnicities in countries with high migrant populations poses a challenge in addressing travel risks for all VFR travellers that are tailored to their specific needs.<sup>13</sup>

### Development of culturally appropriate messages

Various printed travel health promotion and educational materials are available but often not widely circulated. Few published accounts of health promotion strategies aimed at VFR travellers<sup>68-70</sup> and international students<sup>71</sup> are available in the peer reviewed literature and are summarized in Table 1. All use multiple pathways to disseminate simple travel health messages. Interactive, tailored Internet-based travel health resources have also been developed.<sup>70</sup> Multiple dissemination channels reinforce key travel health messages and normalize pre-travel health seeking behaviours as well as provide opportunities to engage immigrants with varying language proficiency, and written and digital literacy related to the diverse ages, educational attainment and length of

settlement and acculturation.<sup>73</sup> While evidence suggests distribution of health promotion messages through mass media does increase health service utilization in general,<sup>74</sup> the broader immigrant health evidence base provides limited, inconsistent evidence of the increased effectiveness of tailored health educational messages through ethnic print and broadcast media compared to general population messages.<sup>75,76</sup> However, the use of ethnic media to disseminate health information may be of value to those with low English-language proficiency and low health system literacy, such as recent immigrants.<sup>77,78</sup>

### Community participation

Immigrants rely on informal information sources through social networks and particularly in early stages of settlement and for those with poor language proficiency.<sup>78</sup> VFR travellers may be more likely to seek pre-travel health information from friends and relatives, indicating the potential for whole of community approaches and the use of peer educators to promote travel health. Health promotion messages for VFR travellers need to address the unique and common barriers to seeking pre-travel health advice,

including risk perceptions, and be culturally sensitive to the language, cultural and religious values that may inhibit or promote uptake of health promotion messages.<sup>32,79</sup> Evaluations of immigrant health promotion campaigns indicate the importance of focusing on family and the community for both delivering and reinforcing messages,<sup>80</sup> thereby, the direct translation of travel health messages aimed at holiday travellers are not likely to be effective. Community consultation at the development stage not only aims to develop culturally sensitive messages, but also build a community commitment.<sup>80</sup> In immigrant health, the use of peer educators<sup>81</sup> and community group information sessions<sup>82</sup> have been positively associated with attitude and behaviour change and has been piloted for delivery of travel health messages by the US CDC (Table 1).<sup>72</sup> There is also the potential for 'word of mouth' dissemination of travel-health messages by ill returned travellers returning to their communities to reinforce risk messages.

### Engaging stakeholders

In addition to better partnerships between travel medicine and primary practice, the development of inter-organizational partnerships

**Table 1.** Published examples of VFR travel health promotion and education strategies

| Paper                                    | Target population                                                | Message dissemination                                                                                                                                                                                                                                                                                                                                                                                                                                                             | Evaluation                                                                                                                                                                     |
|------------------------------------------|------------------------------------------------------------------|-----------------------------------------------------------------------------------------------------------------------------------------------------------------------------------------------------------------------------------------------------------------------------------------------------------------------------------------------------------------------------------------------------------------------------------------------------------------------------------|--------------------------------------------------------------------------------------------------------------------------------------------------------------------------------|
| LaRocque 2017 <sup>70</sup>              | VFR travellers, online resource, USA                             | Heading Home Healthy online resources ( <a href="http://www.headinghomehealthy.org">http://www.headinghomehealthy.org</a> ) supported by Global TravEpiNet, Massachusetts General Hospital and the Centers for Disease Control and Prevention (CDC), including a video message and links to Travellers' Rapid Health Information Portal for VFRs to self-assess before visiting a healthcare provider.                                                                            | Not formally evaluated                                                                                                                                                         |
| O'Sullivan 2017 <sup>72</sup>            | Indian migrants, New Jersey, New York, and Connecticut, USA      | A pilot word-of-mouth marketing programme 'HealthTalker' using peer educators to promote travel health to Indian migrants in the USA. <a href="http://destinationindia.myhealthtalker.com">http://destinationindia.myhealthtalker.com</a>                                                                                                                                                                                                                                         | Increased pre-travel health seeking intentions in the Indian immigrant communities tested. Full evaluation not yet publicly available.                                         |
| Navarro <i>et al.</i> 2012 <sup>68</sup> | Sub-Saharan African and Latin American migrants in Madrid, Spain | Distribution of multilingual, culturally tailored pamphlets at a tropical medicine clinic, NGOs, migrant cultural events, embassies and businesses in high migrant areas, and available online and delivery of advice by trained intercultural mediators at a tropical medicine clinic and a NGO. Materials designed in consultation with ethnic communities. Messages included protection of VFR children, information on specialized pre- and post-travel healthcare resources. | Not formally evaluated. Over 1500 pamphlets distributed and 184 discussions by mediators over 3 years. Good acceptance of messages informally reported.                        |
| Leder <i>et al.</i> 2011 <sup>69</sup>   | Chinese, Vietnamese and Indian migrants in Melbourne, Australia  | Distribution of multilingual, culturally tailored information including a media release, newspaper article, radio interviews and community service announcements and included web-based, and television media. Printed resources (posters, tear sheets and z-cards) distributed at four community festivals. Messages focused on importance of seeking pre-travel consultations.                                                                                                  | Not formally evaluated. Over 5000 z-cards distributed at four festivals (2500 Chinese, 2000 and 700 Vietnamese). Successful media mentions and festival stall visits reported. |
| Gibney <i>et al.</i> 2014 <sup>71</sup>  | International students in Melbourne, Australia                   | Distribution of information to international students through student support advisors, medical practitioners, health insurers, and government and professional organizations. Materials focused on tuberculosis and travel-related infections for international students.                                                                                                                                                                                                        | Not formally evaluated. Informal feedback from agencies sought with on-campus agencies more engaged and online resources preferred.                                            |

**Table 2.** Future research needs in travel medicine and primary practice care of VFR travellers

| Strategies                                                 | Future research needs                                                                                                                                                                                                                                                                                                                                                                                                                                              |
|------------------------------------------------------------|--------------------------------------------------------------------------------------------------------------------------------------------------------------------------------------------------------------------------------------------------------------------------------------------------------------------------------------------------------------------------------------------------------------------------------------------------------------------|
| VFR travellers risk perceptions and barriers to advice     | <ul style="list-style-type: none"> <li>– Further exploration of the psychosocial behavioural factors associated with improved uptake and adherence to preventative travel health practices through quantitative and qualitative methods</li> <li>– VFR-specific evidence on recall, retention and compliance with travel health advice given during consultations, including the impact of strategies that aim to reduce language and cultural barriers</li> </ul> |
| Tailored risk communication                                | <ul style="list-style-type: none"> <li>– Development and evaluation of tailored communication approaches</li> <li>– Exploration of the impact of tailored risk communication and patient-centred or shared decision-making approaches on VFR traveller behavioural change</li> </ul>                                                                                                                                                                               |
| Enhancing patient–provider communication                   | <ul style="list-style-type: none"> <li>– Impact of cultural competence training, professional interpreters and provision of written information on improved retention and adherence to travel health messages</li> </ul>                                                                                                                                                                                                                                           |
| Delivery of pre-travel healthcare through primary practice | <ul style="list-style-type: none"> <li>– Further exploration of the delivery of pre-travel healthcare through primary practice for immigrants and their families, including provider awareness, the impact of a whole-of-life approach to travel health risks/opportunistic travel consultations and the development and evaluation of tailored communication training for primary care providers</li> </ul>                                                       |

and effective links between multiple agencies, including ethnic medical associations, migrant healthcare providers and community resource centres, migrant community groups and organizations are useful strategies for engaging VFRs and improving channels of communication to immigrant communities. A key partnership is the relationship between travel medicine providers and travel agents.<sup>83</sup> Booking travel through travel agents is commonly reported by VFR travellers<sup>28</sup> and referral by a travel agent is a key predictor for pre-travel clinic attendance.<sup>84</sup> Trained travel agents could play an important role in the provision of basic travel health advice to VFR travellers and increasing referrals to their primary care provider.<sup>84,85</sup>

### Future research needs

Table 2 summarizes future research needs for the delivery of travel healthcare to VFR travellers. There is a need to identify evidence-based strategies that address barriers and improve access and provision of pre-travel healthcare to VFR travellers. Research focused on risk perceptions and the underlying psychosocial factors that influence behaviour including the influence of personal control and social pressures<sup>45</sup> is lacking in travel medicine, particularly for VFR travellers. Future research is needed on the use of well-established behavioural models to explain VFR traveller behaviour, better understand barriers such as cost,<sup>32</sup> improve communication and to demonstrate links between effective education and behavioural change. Future research should also focus on engagement of professional interpreters and the effectiveness of supplementary written materials on recall, retention and compliance with travel health advice given. As the main source of professional advice for VFR travellers, a better understanding of the barriers to providing effective advice to VFR travellers is needed to inform the development of training for primary care providers with the aim of improving the provision of travel advice in primary practice. Current VFR literature focuses on VFR travel to low income countries of origin of the traveller predominantly from Western countries. Current data is lacking on VFR risk perceptions and training needs of practitioners in other regions.<sup>86</sup>

In addition to methods to effectively and innovatively communicate risk opportunities for community-consulted approaches to health promotion and policy development need to be further

explored. Measuring the population reach, improved health knowledge, and ultimately, risk reduction of population-based health promotion campaigns is challenging,<sup>87</sup> including those targeting travel health. Evaluation of health promotion activities targeting VFR travellers focus on the feasibility of the intervention<sup>68,69,71</sup> and formal evaluation of community reach and the effectiveness of travel health messages on behaviour change is needed.<sup>80</sup> Future research should include an evaluation of the community impact of health promotion campaigns such as community surveys to measure self-reported recall and recognition of health messages, and before and after studies to evaluate trends in health clinic attendance and website traffic.

### Conclusions

Despite growing evidence of the risks associated with VFR travel, many gaps exist in our understanding of how to best reduce these risks. With the multifactorial barriers related to a range of health beliefs and issues with access to and use of health services, a range of strategies and interventions are required that reduce barriers for VFR travellers at the patient, provider and system level. Of those who do not self-refer for pre-travel advice, strategies that identify future travel and promote travel health, including engagement with immigrant communities, are central to increasing awareness of the risks of VFR travel and improving attendance for pre-travel advice. Of those who do attend, tailored approaches are required to engage and inform VFR travellers and to overcome barriers including cultural and communication barriers and pre-conceived risk perceptions during the consultation. Culturally appropriate health promotion messages that target VFR travellers to attend for pre-travel health advice are needed. Continuing education opportunities for primary care providers, provision of resources and partnerships are required to better serve VFR travellers. Travel medicine must move towards improving the evidence base and dissemination of successful strategies that improve attendance to pre-travel health services and uptake of advice.

### Authors' contributions

A.E.H. drafted the manuscript; N.Z. reviewed, edited and provided critical input.

## Funding

This work was not supported by a specific source of funding

## Conflict of interest

A.E.H. has received consultation fees from GSK and grant funding for investigator-driven research from GSK and Sanofi-Pasteur unrelated to this manuscript. N.Z. has no conflicts to declare.

## References

- Gushulak BD, MacPherson DW. Globalization of infectious diseases: the impact of migration. *Clin Infect Dis* 2004; **38**: 1742–8.
- OECD. *International Migration Outlook 2015*. Paris: OECD Publishing, 2015. Available from: [http://dx.doi.org/10.1787/migr\\_outlook-2015-en](http://dx.doi.org/10.1787/migr_outlook-2015-en).
- World Tourism Organization (UNWTO). World Tourism Organization (UNWTO). UNWTO Tourism Highlights 2015 Edition 2015. Available from: <http://www.e-unwto.org/doi/pdf/10.18111/9789284416899>.
- LaRocque RC, Rao SR, Tsibris A, Lawton T, Barry MA, Marano N *et al*. Pre-travel health advice-seeking behavior among US international travelers departing from Boston Logan International Airport. *J Travel Med* 2010; **17**: 387–91.
- Centers for Disease Control and Prevention. Chapter 8: VFRs: immigrants returning home to visit friends and relatives. In: *CDC Health Information for International Travel (Yellow Book)*, 2016 Edition. New York: Oxford University Press, 2016.
- Barnett ED, MacPherson DW, Stauffer WM, Loutan L, Hatz CF, Matteelli A *et al*. The visiting friends or relatives traveler in the 21st century: time for a new definition. *J Travel Med* 2010; **17**: 163–70.
- Behrens RH, Stauffer WM, Barnett ED, Loutan L, Hatz CF, Matteelli A *et al*. Travel case scenarios as a demonstration of risk assessment of VFR travelers: introduction to criteria and evidence-based definition and framework. *J Travel Med* 2010; **17**: 153–62.
- Leder K, Tong S, Weld L, Kain KC, Wilder-Smith A, von SF *et al*. Illness in travelers visiting friends and relatives: a review of the GeoSentinel Surveillance Network. *Clin Infect Dis* 2006; **43**: 1185–93.
- Heywood AE, Zwar N, Forssman BL, Seale H, Stephens N, Musto J *et al*. The contribution of travellers visiting friends and relatives to notified infectious diseases in Australia: state-based enhanced surveillance. *Epidemiol Infect* 2016; **1**–10.
- Bui YG, Trepanier S, Milord F, Blackburn M, Provost S, Gagnon S. Cases of malaria, hepatitis A, and typhoid fever among VFRs, Quebec (Canada). *J Travel Med* 2011; **18**: 373–8.
- Schlagenhauf P, Weld L, Goorhuis A, Gautret P, Weber R, von Sonnenburg F *et al*. Travel-associated infection presenting in Europe (2008–12): an analysis of EuroTravNet longitudinal, surveillance data, and evaluation of the effect of the pre-travel consultation. *Lancet Infect Dis* 2015; **15**: 55–64.
- Bacaner N, Stauffer B, Boulware DR, Walker PF, Keystone JS. Travel medicine considerations for North American immigrants visiting friends and relatives. *JAMA* 2004; **291**: 2856–64.
- Angell SY, Behrens RH. Risk assessment and disease prevention in travelers visiting friends and relatives. *Infect Dis Clin North Am* 2005; **19**: 49–65.
- Angell SY, Cetron MS. Health disparities among travelers visiting friends and relatives abroad. *Ann Int Med* 2005; **142**: 67–72.
- Fulford M, Keystone JS. Health risks associated with visiting friends and relatives in developing countries. *Curr Infect Dis Rep* 2005; **7**: 48–53.
- Public Health Agency of Canada: Committee to Advise on Tropical Medicine and Travel (CATMAT). *Statement on International Travellers Who Intend to Visit Friends and Relatives*. Ottawa, Canada: Public Health Agency of Canada, 2015.
- Health Protection Agency. Foreign travel-associated illness - a focus on those visiting friends and relatives. 2008 report. London: Health Protection Agency (HPA); 2008.
- Pavli A, Maltezou HC. Malaria and travellers visiting friends and relatives. *Travel Med Infect Dis* 2010; **8**: 161–8.
- Hagmann S, Neugebauer R, Schwartz E, Perret C, Castelli F, Barnett ED *et al*. Illness in children after international travel: analysis from the GeoSentinel Surveillance Network. *Pediatrics* 2010; **125**: e1072–80.
- Hendel-Paterson B, Swanson SJ. Pediatric travelers visiting friends and relatives (VFR) abroad: illnesses, barriers and pre-travel recommendations. *Travel Med Infect Dis* 2010; **9**: 192–203.
- Hagmann S, Benavides V, Neugebauer R, Purswani M. Travel health care for immigrant children visiting friends and relatives abroad: retrospective analysis of a hospital-based travel health service in a US urban underserved area. *J Travel Med* 2009; **16**: 407–12.
- Han P, Yanni E, Jentes ES, Hamer DH, Chen LH, Wilson ME *et al*. Health challenges of young travelers visiting friends and relatives compared with those traveling for other purposes. *Pediatr Infect Dis J* 2012; **31**: 915–9.
- LaRocque RC, Deshpande BR, Rao SR, Brunette GW, Sotir MJ, Jentes ES *et al*. Pre-travel health care of immigrants returning home to visit friends and relatives. *Am J Trop Med Hyg* 2013; **88**: 376–80.
- Baggett HC, Graham S, Kozarsky PE, Gallagher N, Blumensaadt S, Bateman J *et al*. Pretravel health preparation among US residents traveling to India to VFRs: importance of ethnicity in defining VFRs. *J Travel Med* 2009; **16**: 112–8.
- Rovira C, Buffel du Vaure C, Partouche H. Are French general practitioners consulted before travel to developing countries? A cross-sectional study conducted in a French airport. *Rev Epidemiol Sante Publique* 2015; **63**: 253–8.
- Van Herck K, Van Damme P, Castelli F, Zuckerman J, Nothdurft H, Dahlgren AL *et al*. Knowledge, attitudes and practices in travel-related infectious diseases: the European airport survey. *J Travel Med* 2004; **11**: 3–8.
- Heywood AE, Watkins RE, Iamsirithaworn S, Nilvarangkul K, MacIntyre CR. A cross-sectional study of pre-travel health-seeking practices among travelers departing Sydney and Bangkok airports. *BMC Public Health* 2012; **12**: 321.
- Paudel P, Raina C, Zwar N, Seale H, Worth H, Sheikh M *et al*. Risk activities and pre-travel health seeking practices of notified cases of imported infectious diseases in Australia. *J Travel Med* 2017; **24**(5), 10.1093/jtm/tax044.
- Zwar N, Streeton CL. Pretravel advice and hepatitis A immunization among Australian travelers. *J Travel Med* 2007; **14**: 31–6.
- Morgan M, Figueroa-Munoz JL. Barriers to uptake and adherence with malaria prophylaxis by the African community in London, England: focus group study. *Ethn Health* 2005; **10**: 355–72.
- Neave PE, Behrens RH, Jones CO. 'You're losing your Ghanaianess': understanding malaria decision-making among Africans visiting friends and relatives in the UK. *Malar J* 2014; **13**: 287.
- Savage RD, Rosella LC, Crowcroft NS, Arneja J, de Villa E, Horn M *et al*. How can we keep immigrant travelers healthy? Health challenges experienced by Canadian South Asian travelers visiting friends and relatives. *Qual Health Res*; **28**: 610–23.
- Pérez-Molina JA, López-Polín A, Treviño B, Molina I, Goikoetxea J, Díaz-Menéndez M *et al*. 6-year review of +Redivi: a prospective registry of imported infectious diseases in Spain. *J Travel Med* 2017; **24**(5), 10.1093/jtm/tax035.
- Rowe K, Chaves N, Leder K. Challenges to providing pre-travel care for travellers visiting friends and relatives: an audit of a specialist travel medicine clinic. *J Travel Med* 2017; **24**(5), 10.1093/jtm/tax038.
- dos Santos CC, Anvar A, Keystone JS, Kain KC. Survey of use of malaria prevention measures by Canadians visiting India. *CMAJ*. 1999; **160**: 195–200.

36. Wilder-Smith A, Khairullah NS, Song JH, Chen CY, Torresi J. Travel health knowledge, attitudes and practices among Australasian travelers. *J Travel Med* 2004; 11: 9–15.
37. Schunk M, Wachinger W, Nothdurft HD. Vaccination status and prophylactic measures of travelers from Germany to subtropical and tropical areas: results of an airport survey. *J Travel Med* 2001; 8: 260–2.
38. Heywood AE, Forssman BL, Seale H, MacIntyre CR, Zwar N. General practitioners' perception of risk for travelers visiting friends and relatives. *J Travel Med* 2015; 22: 368–74.
39. Carpenter CJ. A meta-analysis of the effectiveness of health belief model variables in predicting behavior. *Health Commun* 2010; 25: 661–9.
40. Noble LM, Willcox A, Behrens RH. Travel clinic consultation and risk assessment. *Infect Dis Clin North Am* 2012; 26: 575–93.
41. Leder K, Chen LH, Wilson ME. Aggregate travel vs. single trip assessment: arguments for cumulative risk analysis. *Vaccine* 2012; 30: 2600–4.
42. MacDougall DM, Halperin BA, MacKinnon-Cameron D, Li L, McNeil SA, Langley JM *et al.* The challenge of vaccinating adults: attitudes and beliefs of the Canadian public and healthcare providers. *BMJ Open* 2015; 5.
43. Malosh R, Ohmit SE, Petrie JG, Thompson MG, Aiello AE, Monto AS. Factors associated with influenza vaccine receipt in community dwelling adults and their children. *Vaccine* 2014; 32: 1841–7.
44. Corace KM, Srigley JA, Hargadon DP, Yu D, MacDonald TK, Fabrigar LR *et al.* Using behavior change frameworks to improve healthcare worker influenza vaccination rates: a systematic review. *Vaccine* 2016; 34: 3235–42.
45. Sridhar S, Régner I, Brouqui P, Gautret P. Methodologies for measuring travelers' risk perception of infectious diseases: a systematic review. *Travel Med Infect Dis* 2016; 14: 360–72.
46. Pottie K, Greenaway C, Feightner J, Welch V, Swinkels H, Rashid M *et al.* Evidence-based clinical guidelines for immigrants and refugees. *Cmaj*. 2011; 183: E824–925.
47. Beach MC, Price EG, Gary TL, Robinson KA, Gozu A, Palacio A *et al.* Cultural competence: a systematic review of health care provider educational interventions. *Med Care*. 2005; 43: 356–73.
48. Lebrun LA. Effects of length of stay and language proficiency on health care experiences among Immigrants in Canada and the United States. *Soc Sci Med* 2012; 74: 1062–72.
49. Alqahtani AS, Sheikh M, Wiley K, Heywood AE. Australian Hajj Pilgrims' infection control beliefs and practices: insight with implications for public health approaches. *Travel Med Infect Dis* 2015; 13: 329–34.
50. Paternotte E, van Dulmen S, van der Lee N, Scherpbier AJ, Scheele F. Factors influencing intercultural doctor-patient communication: a realist review. *Patient Educ Couns* 2015; 98: 420–45.
51. McGuinness SL, Spelman T, Johnson DF, Leder K. Immediate recall of health issues discussed during a pre-travel consultation. *J Travel Med* 2015; 22: 145–51.
52. Lestelle C, Aymeric S, Maakaroun-Vermesse Z, Pouliquen A, Bernard L, Chandénier J *et al.* Impact of advice given to travelers concerning the main infectious risks associated with traveling in the tropics. *Med Mal Infect* 2015; 45: 222–8.
53. Flores G. The impact of medical interpreter services on the quality of health care: a systematic review. *Med Care Res Rev* 2005; 62: 255–99.
54. O'Reilly-de Brún M, MacFarlane A, de Brún T, Okonkwo E, Bonsenge Bokanga JS, Manuela De Almeida Silva M *et al.* Involving migrants in the development of guidelines for communication in cross-cultural general practice consultations: a participatory learning and action research project. *BMJ Open* 2015; 5: 9.
55. Seale H, Kaur R, Mahimbo A, MacIntyre CR, Zwar N, Smith M *et al.* Improving the uptake of pre-travel health advice amongst migrant Australians: exploring the attitudes of primary care providers and migrant community groups. *BMC Infect Dis* 2016; 16: 213.
56. Thava SS, Leggat PA. Referral of travellers from Australia by general practitioners for travel health advice. *Travel Med Infect Dis* 2003; 1: 185–8.
57. Porter JF, Knill-Jones RP. Quality of travel health advice in higher-education establishments in the United Kingdom and its relationship to the demographic background of the provider. *J Travel Med* 2004; 11: 347–53.
58. Kogelman L, Barnett ED, Chen LH, Quinn E, Yanni E, Wilson ME *et al.* Knowledge, attitudes, and practices of US practitioners who provide pre-travel advice. *J Travel Med* 2014; 21: 104–14.
59. Thava SS, Leggat PA. Health advice given by general practitioners for travellers from Australia. *Travel Med Infect Dis* 2003; 1: 47–52.
60. Hoveyda N, McDonald P, Behrens RH. A description of travel medicine in general practice: a postal questionnaire survey. *J Travel Med* 2004; 11: 295–9.
61. Leder K, Steffen R, Cramer JP, Greenaway C. Risk assessment in travel medicine: how to obtain, interpret, and use risk data for informing pre-travel advice. *J Travel Med* 2014; 22: 13–20.
62. Sofarelli TA, Ricks JH, Anand R, Hale DC. Standardized training in nurse model travel clinics. *J Travel Med* 2011; 18: 39–43.
63. Durham MJ, Goad JA, Neinstein LS, Lou M. A comparison of pharmacist travel-health specialists' versus primary care providers' recommendations for travel-related medications, vaccinations, and patient compliance in a college health setting. *J Travel Med* 2011; 18: 20–5.
64. Boddington NL, Simons H, Launder N, Hill DR. Quality improvement in travel medicine: a programme for yellow fever vaccination centres in England, Wales and Northern Ireland. *Qual Prim care* 2011; 19: 391–8.
65. Hagmann S, Reddy N, Neugebauer R, Purswani M, Leder K. Identifying future VFR travelers among immigrant families in the Bronx, New York. *J Travel Med* 2010; 17: 193–6.
66. Leggat PA, Heydon JL, Menon A. Health advice given by general practitioners for travellers from New Zealand. *N Z Med J* 1999; 112: 158–61.
67. Angell SY, Behrens RH. Risk assessment and disease prevention in travelers visiting friends and relatives. *Infect Dis Clin North Am* 2005; 19: 49–65.
68. Navarro M, Navaza B, Guionnet A, Lopez-Velez R. A multidisciplinary approach to engage VFR migrants in Madrid, Spain. *Travel Med Infect Dis* 2012; 10: 152–6.
69. Leder K, Lau S, Leggat P. Innovative community-based initiatives to engage VFR travelers. *Travel Med Infect Dis* 2011; 9: 258–61.
70. LaRocque R, editor. Heading Home Healthy: A suite of tools for VFR travellers and primary care practitioners. 15th Conference of the International Society of Travel Medicine (CISTM15); 2017 14–18 May 2017; Barcelona, Spain.
71. Gibney KB, Brass A, Hume SC, Leder K. Educating international students about tuberculosis and infections associated with travel to visit friends and relatives (VFR-travel). *Travel Med Infect Dis* 2014; 12: 274–82.
72. O'Sullivan M, Erskine S, Simcox S, Holton K, Brunette G, editors. Establishing a word-of-mouth marketing program to promote travel health. 15th Conference of the International Society of Travel Medicine (CISTM15); 2017 14–18 May 2017; Barcelona, Spain.
73. Goodall K, Ward P, Newman L. Use of information and communication technology to provide health information: what do older migrants know, and what do they need to know? *Qual Prim care* 2010; 18: 27–32.
74. Grilli R, Ramsay C, Minozzi S. Mass media interventions: effects on health services utilisation. *Cochrane Database Syst Rev* 2002; 1: CD000389.
75. Sun A, Zhang J, Tsoh J, Wong-Kim E, Chow E. The effectiveness in utilizing Chinese media to promote breast health among Chinese women. *J Health Commun* 2007; 12: 157–71.

76. Mosdol A, Lidal IB, Straumann GH, Vist GE. Targeted mass media interventions promoting healthy behaviours to reduce risk of non-communicable diseases in adult, ethnic minorities. *Cochrane Database Syst Rev* 2017; 2: CD011683.
77. Ahmad F, Shik A, Vanza R, Cheung A, George U, Stewart DE. Popular health promotion strategies among Chinese and East Indian immigrant women. *Women Health* 2004; 40: 21–40.
78. Caidi N, Allard D, Quirke L. Information practices of immigrants. *Ann Rev Info Sci Tech* 2010; 44: 491–531. doi:10.1002/aris.2010.1440440118.
79. Netto G, Bhopal R, Lederle N, Khatoon J, Jackson A. How can health promotion interventions be adapted for minority ethnic communities? Five principles for guiding the development of behavioural interventions. *Health Promot Int* 2010; 25: 248–57.
80. Kreps GL, Sparks L. Meeting the health literacy needs of immigrant populations. *Patient Educ Couns* 2008; 71: 328–32.
81. Drummond PD, Mizan A, Brocx K, Wright B. Using peer education to increase sexual health knowledge among West African refugees in western Australia. *Health Care Women Int* 2011; 32: 190–205.
82. Renzaho AMN, Vignjevic S. The impact of a parenting intervention in Australia among migrants and refugees from Liberia, Sierra Leone, Congo, and Burundi: results from the African Migrant Parenting Program. *J Family Studies* 2011; 17: 71–9.
83. MacDougall L, Gyorkos T. Promoting travel clinic referrals: exploring partnerships for healthier travel. *Soc Sci Med* 2001; 53: 1461–8.
84. Provost S, Soto JC. Predictors of pretravel consultation in tourists from Quebec (Canada). *J Travel Med* 2001; 8: 66–75.
85. MacDougall LA, Gyorkos TW, Leffondre K, Abrahamowicz M, Tessier D, Ward BJ *et al.* Increasing referral of at-risk travelers to travel health clinics: evaluation of a health promotion intervention targeted to travel agents. *J Travel Med* 2001; 8: 232–42.
86. Leder K, Borwein S, Chanthavanich P, Chatterjee S, Htun K, Marma ASP *et al.* Travel medicine perspectives of select travel medicine experts practicing in the Asia-Pacific region. *J Travel Med* 2017; 24(4), 10.1093/jtm/tax012.
87. Morris DS, Rooney MP, Wray RJ, Kreuter MW. Measuring exposure to health messages in community-based intervention studies: a systematic review of current practices. *Health Educ Behav* 2009; 36: 979–98.
